# Supplementary material for: Crystal engineering of nonporous organic solids for methane sorption
Source: Royal Society of Chemistry journal article supplement (doi:10.1039/b507406a), 2005-01-01
Supplement: b507406a.pdf [file b507406a.pdf]

**Supplementary information for Chemical Communication**

**Crystal engineering of nonporous organic solids for methane sorption**

Praveen K. Thallapally,<sup>a</sup> Trevor B. Wirsig,<sup>a</sup> Leonard J. Barbour,<sup>b</sup> and Jerry L. Atwood<sup>\*,a</sup>

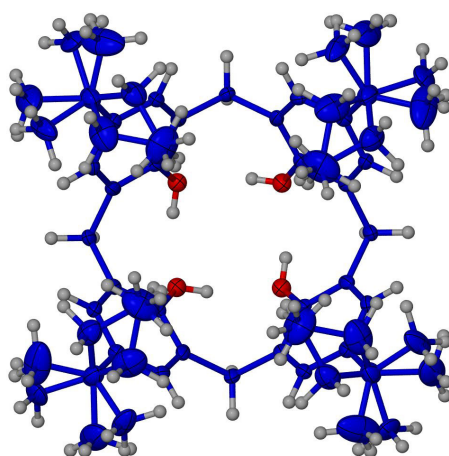

Ortep diagram of **2**. Notice the pentyl groups are disordered over two positions.

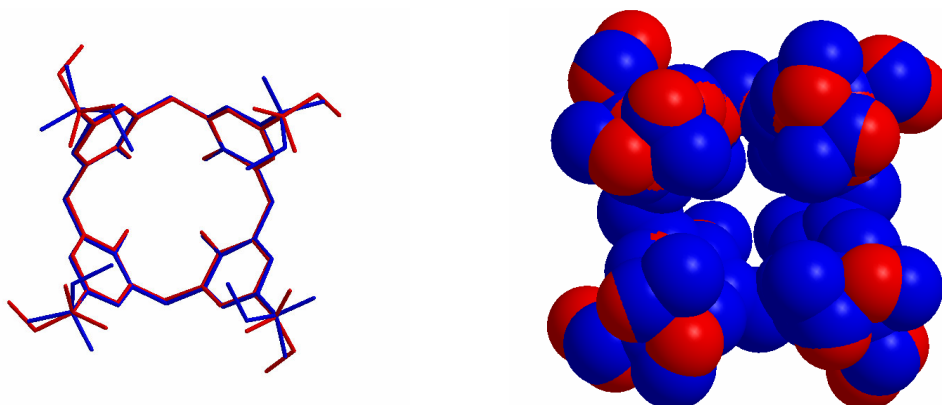

Overlay diagram of **2** and **2.toluene**. Notice the *tert*-pentyl groups are pointing inside in **2** (Blue) whereas outwards in **2.toluene** (Red)
